# Supplementary material for: Treatment-resistant depression and risk of autoimmune diseases: evidence from a population-based cohort and nested case-control study
Source: PubMed Central journal article supplement (PMC9981710; doi:10.1038/s41398-023-02383-9), 2023-03-03
Supplement: 41398_2023_2383_MOESM1_ESM.pdf [file 41398_2023_2383_MOESM1_ESM.pdf]

## **SUPPLEMENTARY MATERIALS**

**Supplementary Figure 1** – Schematic presentation of cohort study design

**Supplementary Figure 2** – Onset distribution of autoimmune diseases among patients with and without TRD in the cohort study

**Supplementary Table 1** – List of ICD-9 codes for diagnoses of depression, autoimmune diseases, and medical history
