# Supplementary material for: Treatment-resistant depression and risk of autoimmune diseases: evidence from a population-based cohort and nested case-control study
Source: PubMed Central journal article supplement (PMC9981710; doi:10.1038/s41398-023-02383-9), 2023-03-03
Supplement: 41398_2023_2383_MOESM2_ESM.pdf [file 41398_2023_2383_MOESM2_ESM.pdf]

**Supplementary Figure 1.** Schematic presentation of cohort study design

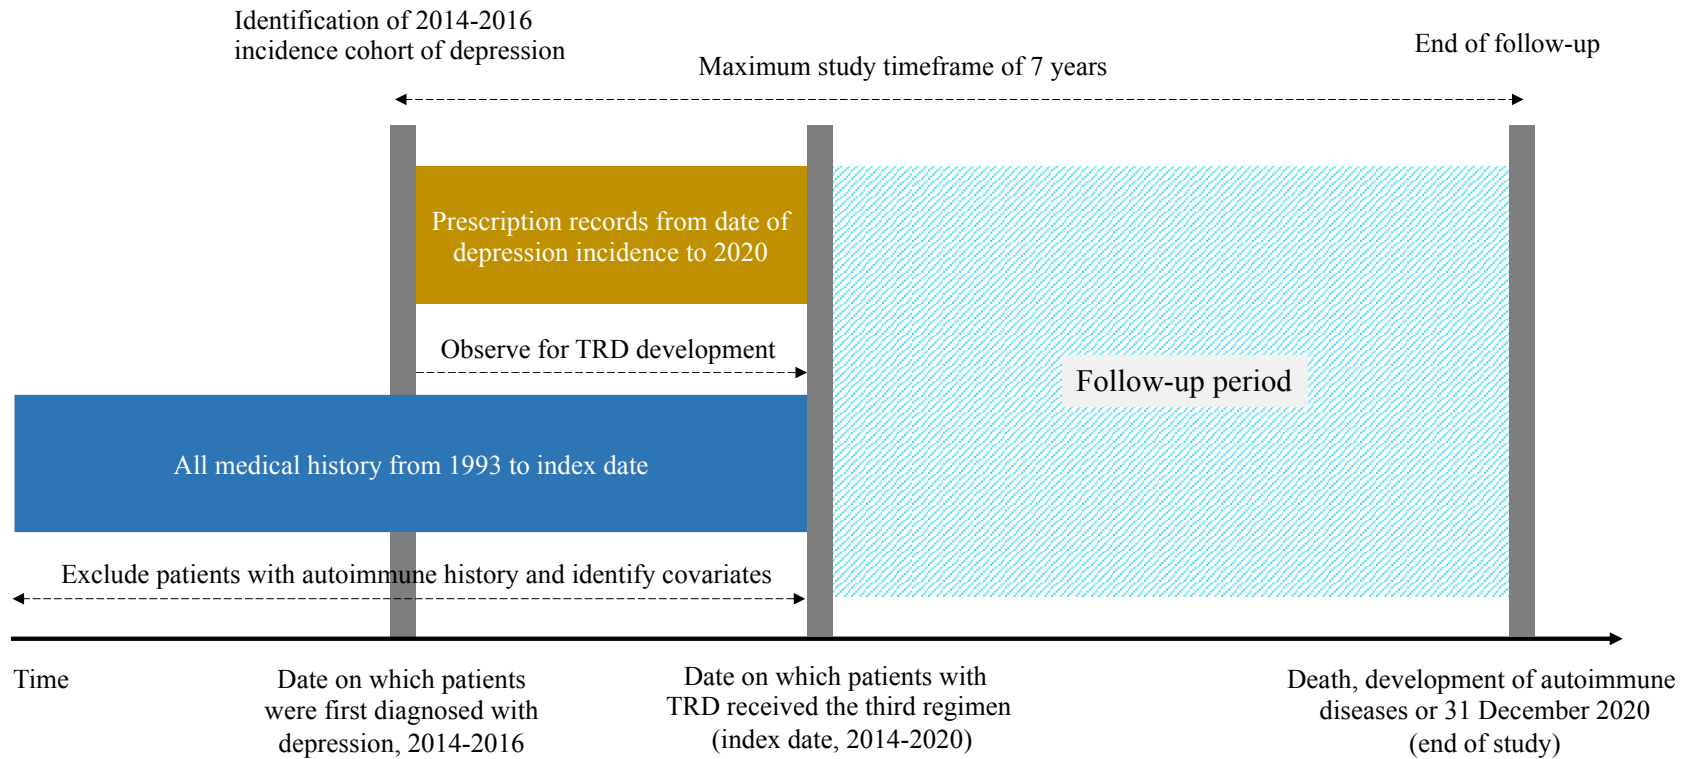

Non-TRD patients did not have the third regimen. Index dates of their matched TRD patients in the same matching stratum were assigned. Abbreviation: TRD – Treatment-resistant depression.

**Supplementary Figure 2.** Onset distribution of autoimmune diseases among patients with and without TRD in the retrospective cohort study

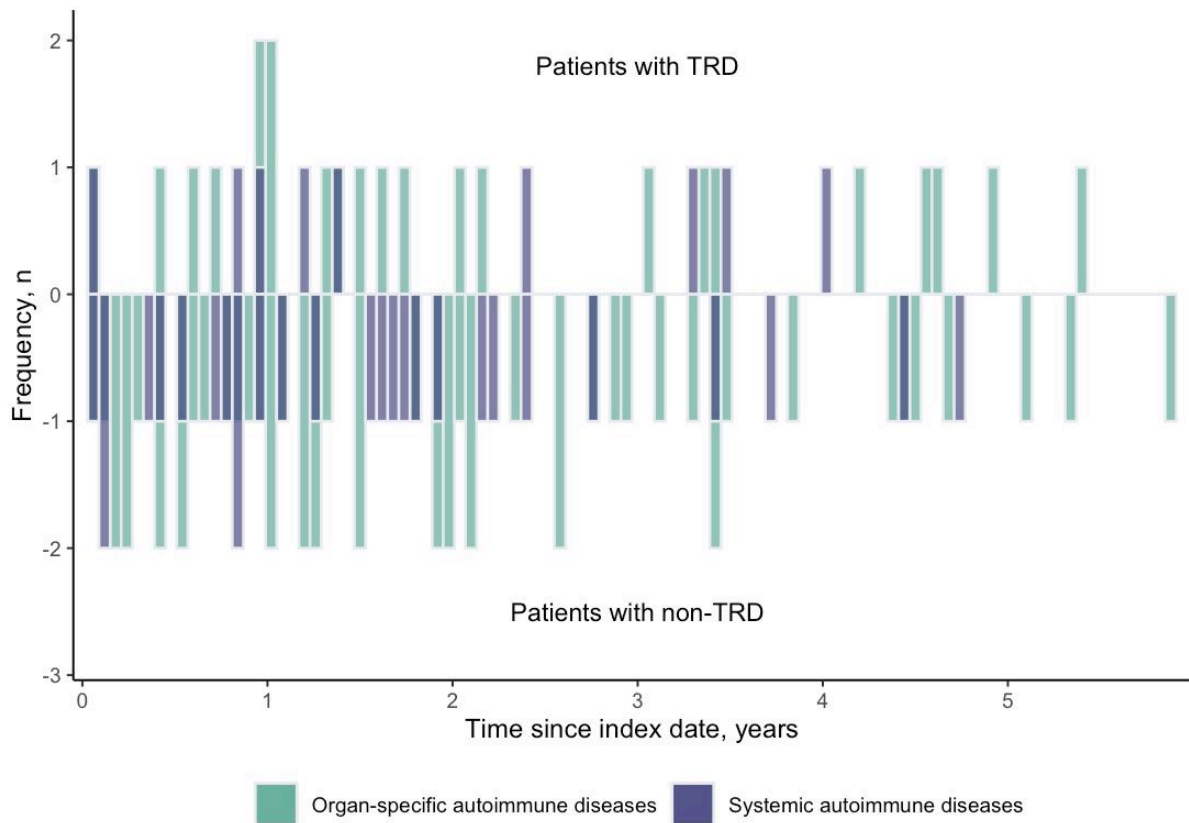

Abbreviation: TRD – Treatment-resistant depression.

**Supplementary Table 1.** List of ICD-9-CM codes for diagnoses of depression, autoimmune diseases, and medical history

| <b>Diseases / Conditions</b>                            | <b>ICD-9-CM codes</b>         |
|---------------------------------------------------------|-------------------------------|
| <b>Depression<sup>1</sup></b>                           |                               |
| Major depressive disorder, single episode               | 296.2                         |
| Major depressive disorder, recurrent episode            | 296.3                         |
| Dysthymic disorder                                      | 300.4                         |
| Depressive disorder, not elsewhere classified           | 311                           |
| <b>Organ-specific autoimmune diseases<sup>2-8</sup></b> |                               |
| Inflammatory bowel diseases                             | 555-556                       |
| Ankylosing spondylitis / Spondylarthritis               | 720.0                         |
| Psoriasis                                               | 696                           |
| Insulin-dependent diabetes mellitus (IDDM)              | 250.x1, 250.x3, where x = 0-9 |
| Hashimoto's thyroiditis                                 | 245.2                         |
| Graves' disease                                         | 242.00, 242.01                |
| Coeliac disease                                         | 579.0                         |
| Vitiligo                                                | 709.01                        |
| Alopecia areata                                         | 704.01                        |
| Pemphigus vulgaris                                      | 694.4                         |
| Dermatitis herpetiformis                                | 694.0                         |
| Pernicious anaemia                                      | 281.0                         |
| Immune thrombocytopenic purpura                         | 287.31                        |
| Iridocyclitis                                           | 364.0-364.3                   |
| Pemphigoid                                              | 694.5, 694.6                  |
| <b>Systemic autoimmune diseases<sup>2,3,9</sup></b>     |                               |
| Systemic lupus erythematosus                            | 710.0                         |
| Rheumatoid arthritis                                    | 714.0-714.9                   |
| Sjogren disease                                         | 710.2                         |
| Systemic sclerosis                                      | 710.1                         |
| Polymyositis/dermatomyositis                            | 710.3-710.4                   |
| Multiple sclerosis                                      | 340                           |
| Juvenile arthritis                                      | 714.30, 714.33                |
| <b>Physical disorders</b>                               |                               |
| Obesity                                                 | 278                           |
| Hypertensive diseases                                   | 401-405                       |
| Non-Insulin-dependent diabetes mellitus (NIDDM)         | 250.x0, 250.x2, where x = 0-9 |
| Any cardiovascular diseases                             |                               |
| - Ischaemic heart disease                               | 410-414                       |
| - Cerebrovascular disease                               | 430-434, 436-438              |
| - Emboli and thrombosis                                 | 415, 444, 445                 |
| - Heart failure                                         | 428                           |
| - Arrhythmia / conduction disorder                      | 426-427                       |
| Any tumours                                             |                               |
| - Non-metastatic solid tumours                          | 140-172, 174-195              |
| - Metastatic solid tumours                              | 196-199                       |
| <b>Psychiatric disorders<sup>1,10-12</sup></b>          |                               |
| Attention-deficit-hyperactivity disorder                | 314                           |
| Autism                                                  | 299.0                         |
| Psychosis                                               | 297, 298                      |
| Schizophrenia                                           | 295                           |
| Epilepsy                                                | 345                           |
| Anxiety disorder                                        | 300.0, 293.84                 |

| <b>Diseases / Conditions</b>  | <b>ICD-9-CM codes</b>           |
|-------------------------------|---------------------------------|
| Personality disorder          | 301                             |
| Substance use disorders       | 292, 304.0-304.93, 305.1-305.93 |
| Dementia                      | 290                             |
| Bipolar disorder              | 296.0, 296.1, 296.4-296.8       |
| Obsessive-compulsive disorder | 300.3                           |
| Eating disorder               | 307.1, 307.51                   |

Abbreviation: ICD-9-CM – International Classification of Diseases, 9<sup>th</sup> Revision, Clinical Modification.

### References:

1. Chan V. K. Y., Cheung E. C. L., Chan S. S. M., Knapp M., Hayes J. F., Min F., et al. Mortality-causing mechanisms and healthcare resource utilisation of treatment-resistant depression: A six-year population-based cohort study. *Lancet Reg Health West Pac.* 2022;100426.
2. Li X., Tong X., Yeung W. W. Y., Kuan P., Yum S. H. H., Chui C. S. L., et al. Two-dose COVID-19 vaccination and possible arthritis flare among patients with rheumatoid arthritis in Hong Kong. *Ann Rheum Dis.* 2022;81(4):564-8.
3. Yang M. H. , Huang J. Y., Chen S. L., Wei J. C. Association of Interstitial Cystitis/Bladder Pain Syndrome: A Nationwide Population-Based Study. *J Clin Med.* 2021;10(23):5669.
4. Chen M. H., Tsai S. J., Bai Y. M., Huang K. L., Su T. P., Chen T. J., et al. Type 1 diabetes mellitus and risks of major psychiatric disorders: A nationwide population-based cohort study. *Diabetes Matab.* 2022;48(1):101319.
5. Sheth V. M., Guo Y., Qureshi A. A. Comorbidities associated with vitiligo: a ten-year retrospective study. *Dermatology.* 2013;227(4):311-315.
6. Hsu Y. M., Fang H. Y., Lin C. L., Shieh S. H. The Risk of Depression in Patients with Pemphigus: A Nationwide Cohort Study in Taiwan. *Int J Environ Res Public Health.* 2020;17(6):1983.
7. Tarantino M. D., Danese M., Klaassen R. J., Duryea J., Eisen M., Bussel J. Hospitalizations in pediatric patients with immune thrombocytopenia in the United States. *Platelets.* 2016;27(5):472-478.
8. Weng S. F., Jan R. L., Chang C., Wang J. J., Su S. B., Huang C. C., et al. Risk of Band Keratopathy in Patients with End-Stage Renal Disease. *Sci Rep.* 2016;6:28675.
9. Lauden A., Geishin A., Merzon E., Korobeinikov A., Green I., Golan-Cohen A., et al. Higher rates of allergies, autoimmune diseases and low-grade inflammation markers in treatment-resistant major depression. *Brain Behav Immun Health.* 2021;16:100313.
10. Ng V. W. S., Man K. K. C., Gao L., Chan E. W., Lee E. H. M., Hayes J. F., et al. Bipolar disorder prevalence and psychotropic medication utilisation in Hong Kong and the United Kingdom. *Pharmacoepidemiol Drug Saf.* 2021;30(11):1588-1600.
11. Tseng M. M., Tu C. Y., Hsieh S. F., Chang C. H. Rates and trends in healthcare-detected incidence of anorexia nervosa and bulimia nervosa; A national health insurance claim data study in Taiwan, 2002-2013. *Int J Eat Disord.* 2020;53(3):331-338.

12. Chai Y., Luo H., Wong G. H. Y., Tang J. Y. M., Lam T. C., Wong I. C. K., et al. Risk of self-harm after the diagnosis of psychiatric disorders in Hong Kong, 2000-10: a nested case-control study. *Lancet Psychiatry*. 2020;7(2):135-147.
